# Supplementary material
Source: PubMed Central journal article supplement (PMC3780786)
Supplement: NIHMS475962-supplement-Supplemental_Table_1.pdf [file NIHMS475962-supplement-Supplemental_Table_1.pdf]

**Supplementary Table 1: Altered miRNA expression of glioblastoma relative to normal brain**

| <b>miRNA</b> | <b>Relative downregulation</b> | <b>miRNA</b> | <b>Relative upregulation</b> |
|--------------|--------------------------------|--------------|------------------------------|
| miR-124      | 24.6                           | miR-1273     | 3.7                          |
| miR-3172     | 13.8                           | miR-559      | 3.6                          |
| miR-138      | 13.4                           | miR-4286     | 3.2                          |
| miR-3196     | 8.5                            | miR-3152     | 3.1                          |
| let-7b       | 7.3                            | miR-766      | 3                            |
| let-7e       | 6.9                            | miR-542-3p   | 2.7                          |
| miR-1826     | 5.9                            | miR-1302     | 2.7                          |
| miR-1228*    | 5.8                            | miR-2355     | 2.7                          |
| miR-4284     | 5.6                            | miR-1285     | 2.6                          |
| let-7d       | 5.6                            | miR-548c-5p  | 2.5                          |
| miR-3162     | 5.4                            | miR-1281     | 2.3                          |
| miR-874      | 5.2                            | miR-1248     | 2.2                          |
| let-7c       | 5.2                            | miR-1272     | 2.1                          |
| miR-103      | 5                              | miR-488*     | 2.1                          |
| miR-128      | 4.9                            | miR-3192     | 2.1                          |
| let-7a       | 4.7                            | miR-548d-5p  | 2.1                          |
| miR-26a      | 4.5                            | miR-3197     | 2.1                          |
| miR-762      | 4.5                            | miR-4323     | 2.1                          |
| miR-7        | 4.2                            | miR-3146     | 2                            |
