# Supplementary material
Source: PubMed Central journal article supplement (PMC3780786)
Supplement: NIHMS475962-supplement-Supplemental_Table_2.pdf [file NIHMS475962-supplement-Supplemental_Table_2.pdf]

**Supplementary Table 2: Predicted binding affinity of glioblastoma down-regulated miRNAs for STAT3**

| miRNA     | Conserved sites |      |      | Poorly conserved sites |      |      | Aggregate P <sub>CT</sub> |
|-----------|-----------------|------|------|------------------------|------|------|---------------------------|
|           | Total           | 8mer | 7mer | Total                  | 8mer | 7mer |                           |
| miR-124   | 1               | 1    | 0    | 0                      | 0    | 0    | 0.85                      |
| miR-17-5p | 2               | 0    | 2    | 1                      | 0    | 1    | 0.85                      |
| miR-125   | 1               | 1    | 0    | 0                      | 0    | 0    | 0.84                      |
| miR-129   | 0               | 0    | 0    | 3                      | 1    | 2    | 0.58                      |
| miR-29abc | 0               | 0    | 0    | 1                      | 0    | 1    | 0.2                       |
| miR-150   | 0               | 0    | 0    | 1                      | 0    | 1    | 0.2                       |
| miR-34a   | 0               | 0    | 0    | 1                      | 0    | 1    | 0.15                      |
| miR-425   | 0               | 0    | 0    | 1                      | 0    | 1    | 0.14                      |
| miR-21    | 0               | 0    | 0    | 2                      | 0    | 2    | 0.13                      |
| miR-221   | 0               | 0    | 0    | 1                      | 0    | 1    | 0.12                      |
| miR-383   | 0               | 0    | 0    | 1                      | 0    | 1    | 0.11                      |
| miR-214   | 0               | 0    | 0    | 1                      | 0    | 1    | 0.11                      |
